# Supplementary material
Source: PubMed Central journal article supplement (PMC9665092)

Sleep

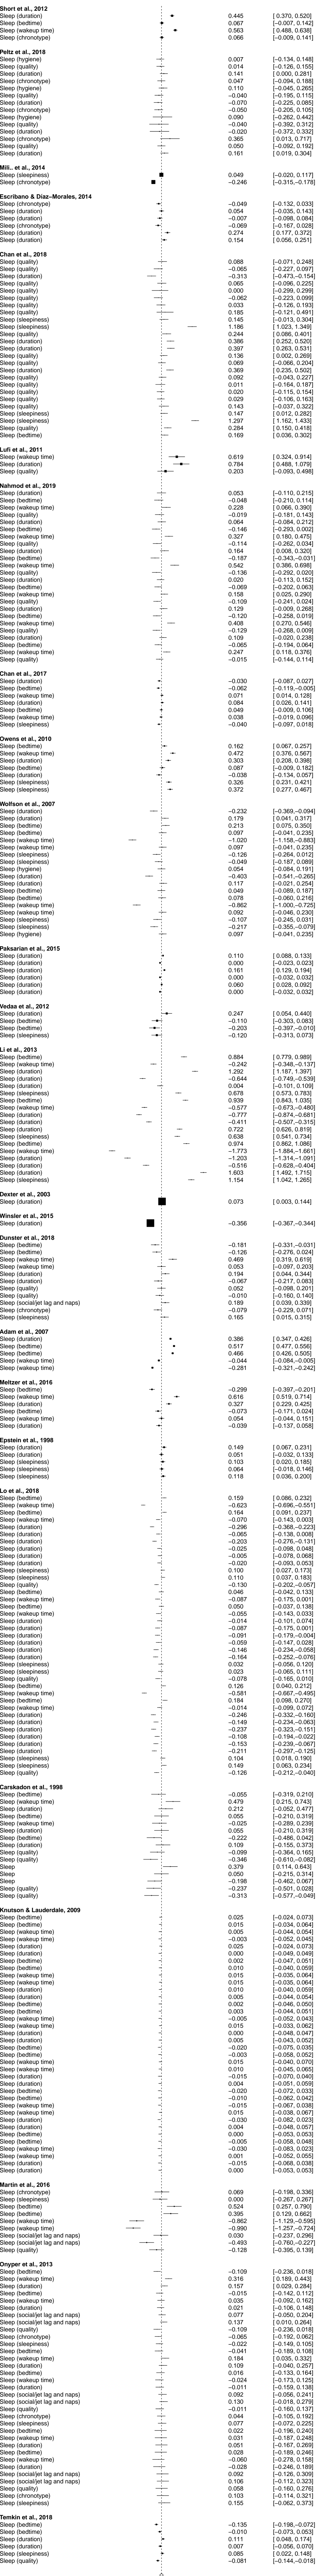

Sleep (duration)

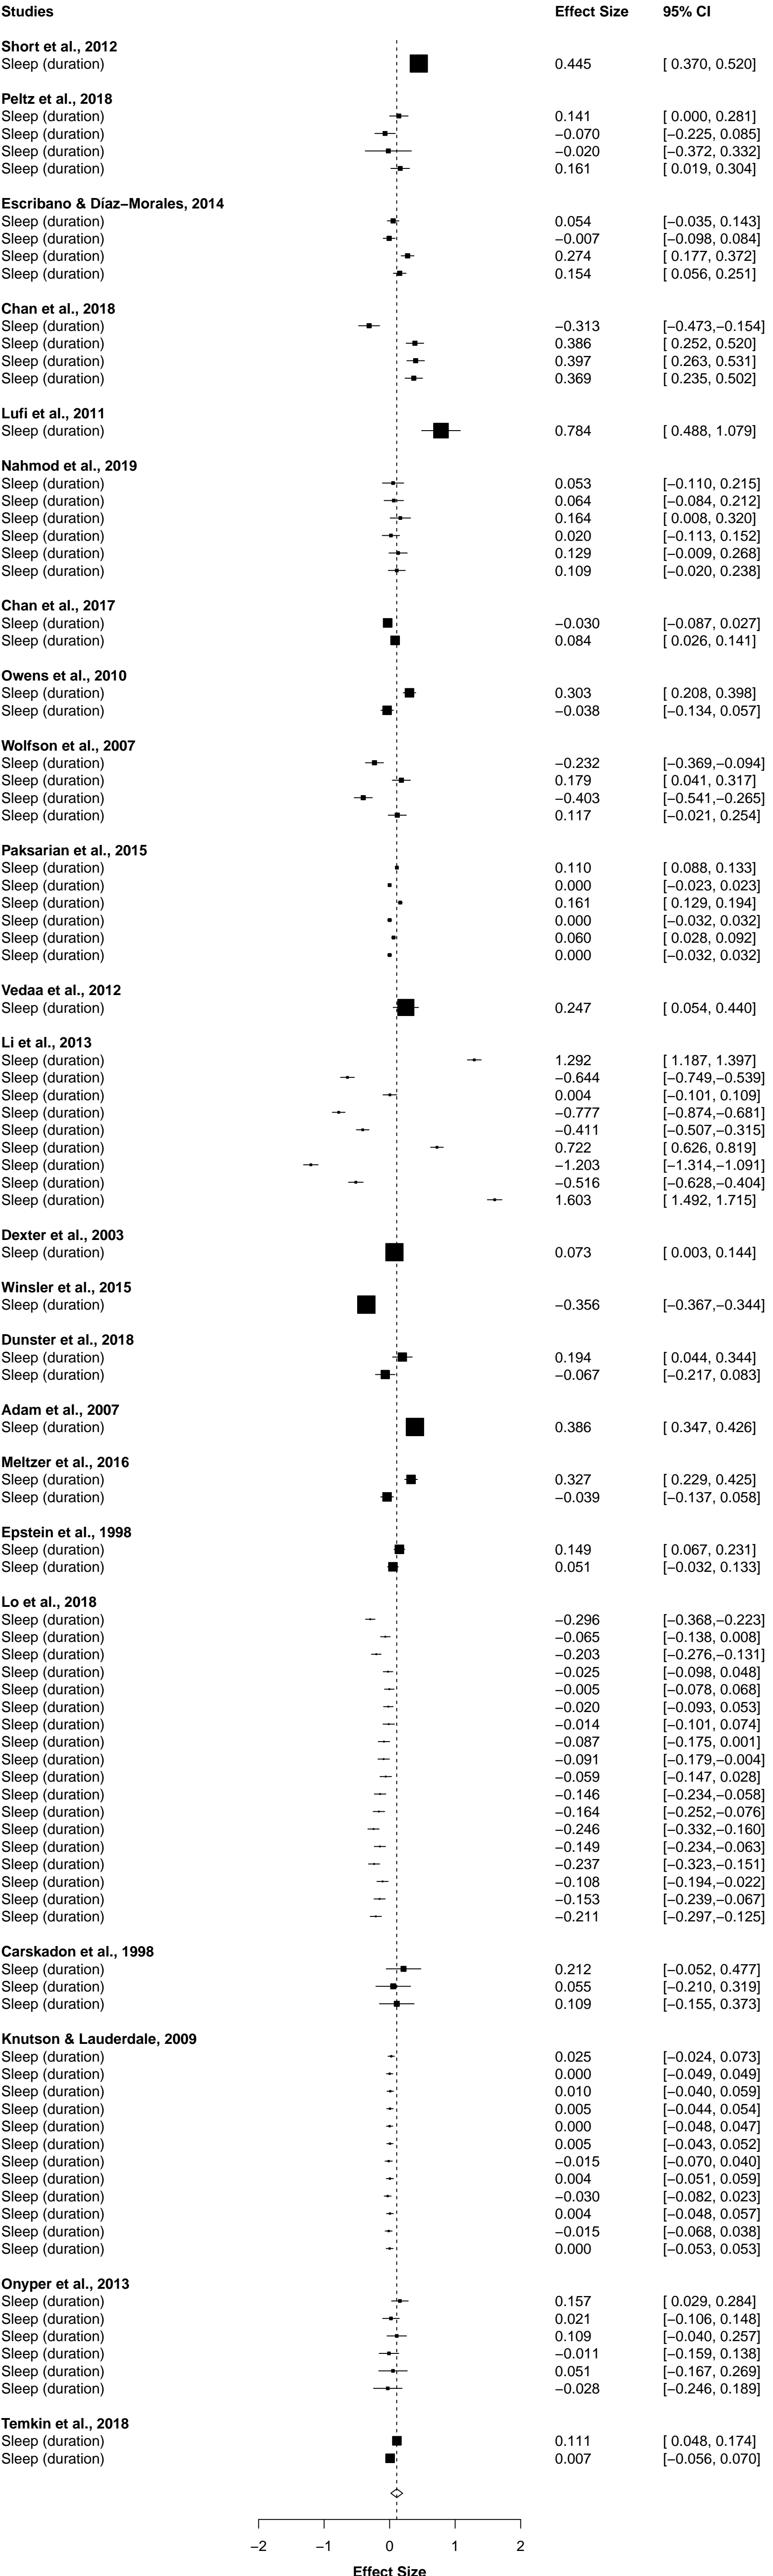

-2 -1 0 1 2  
Effect Size

## Sleep (quality)

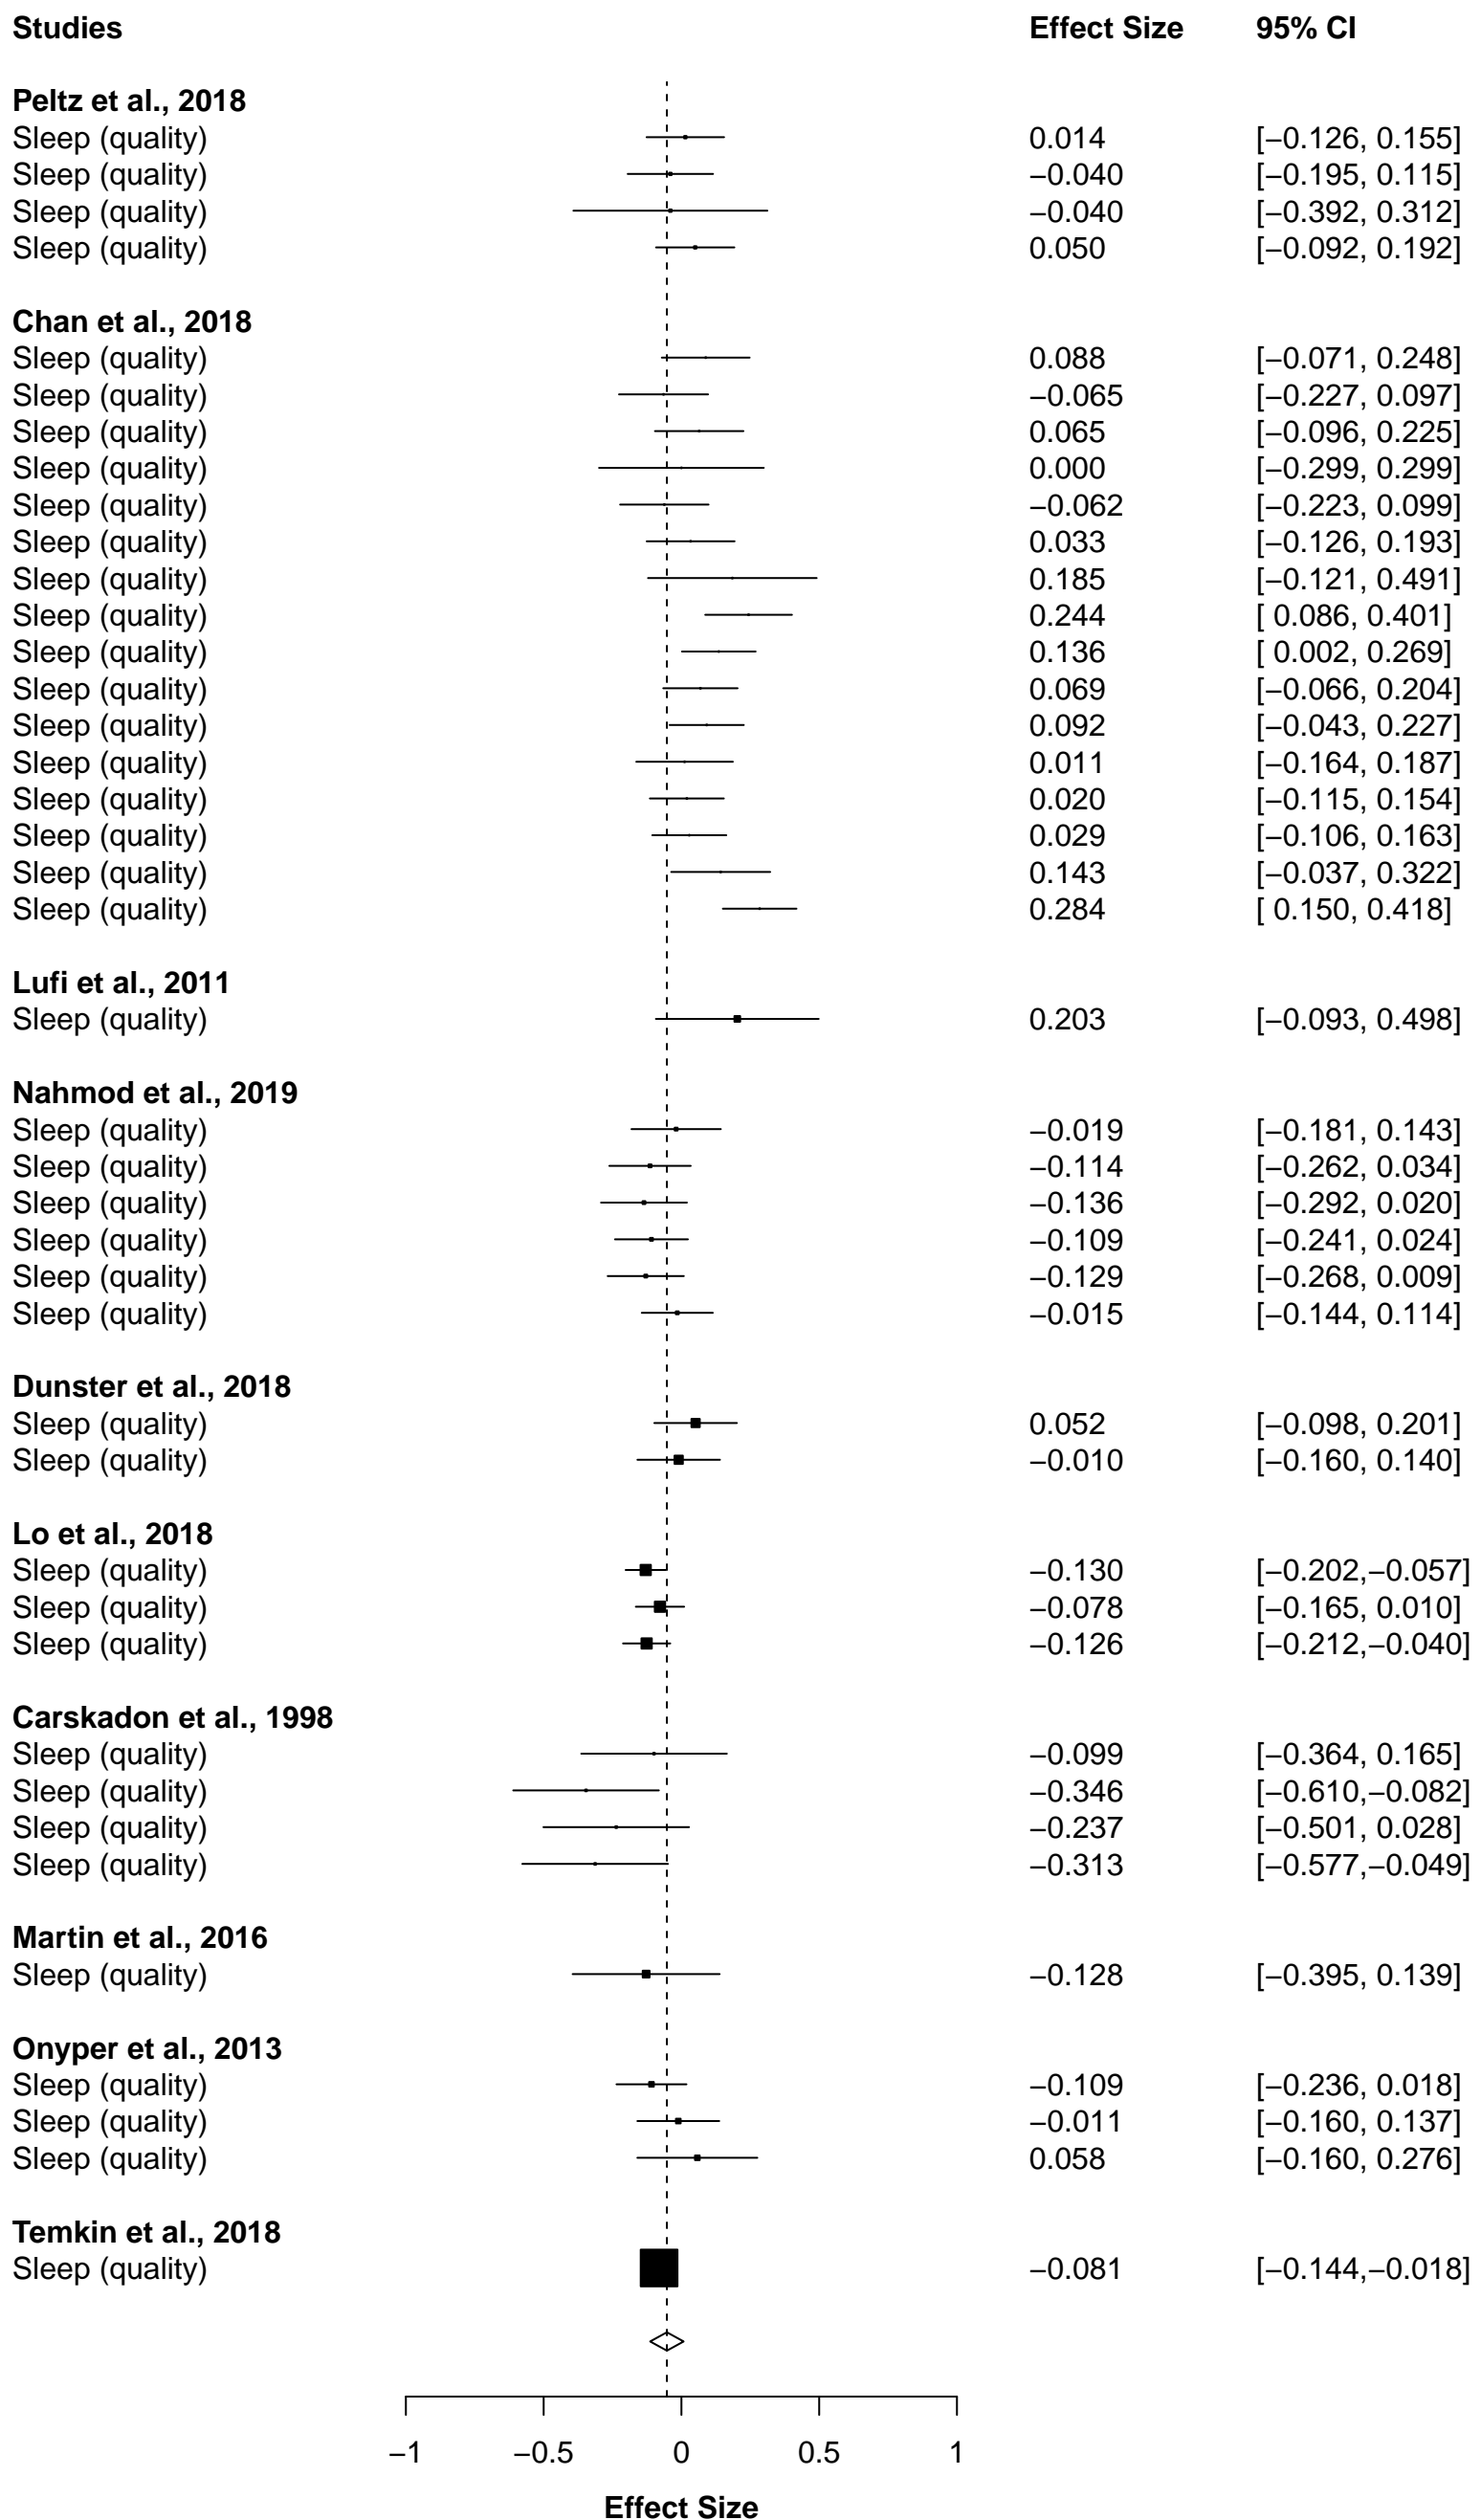

Sleep (bedtime)

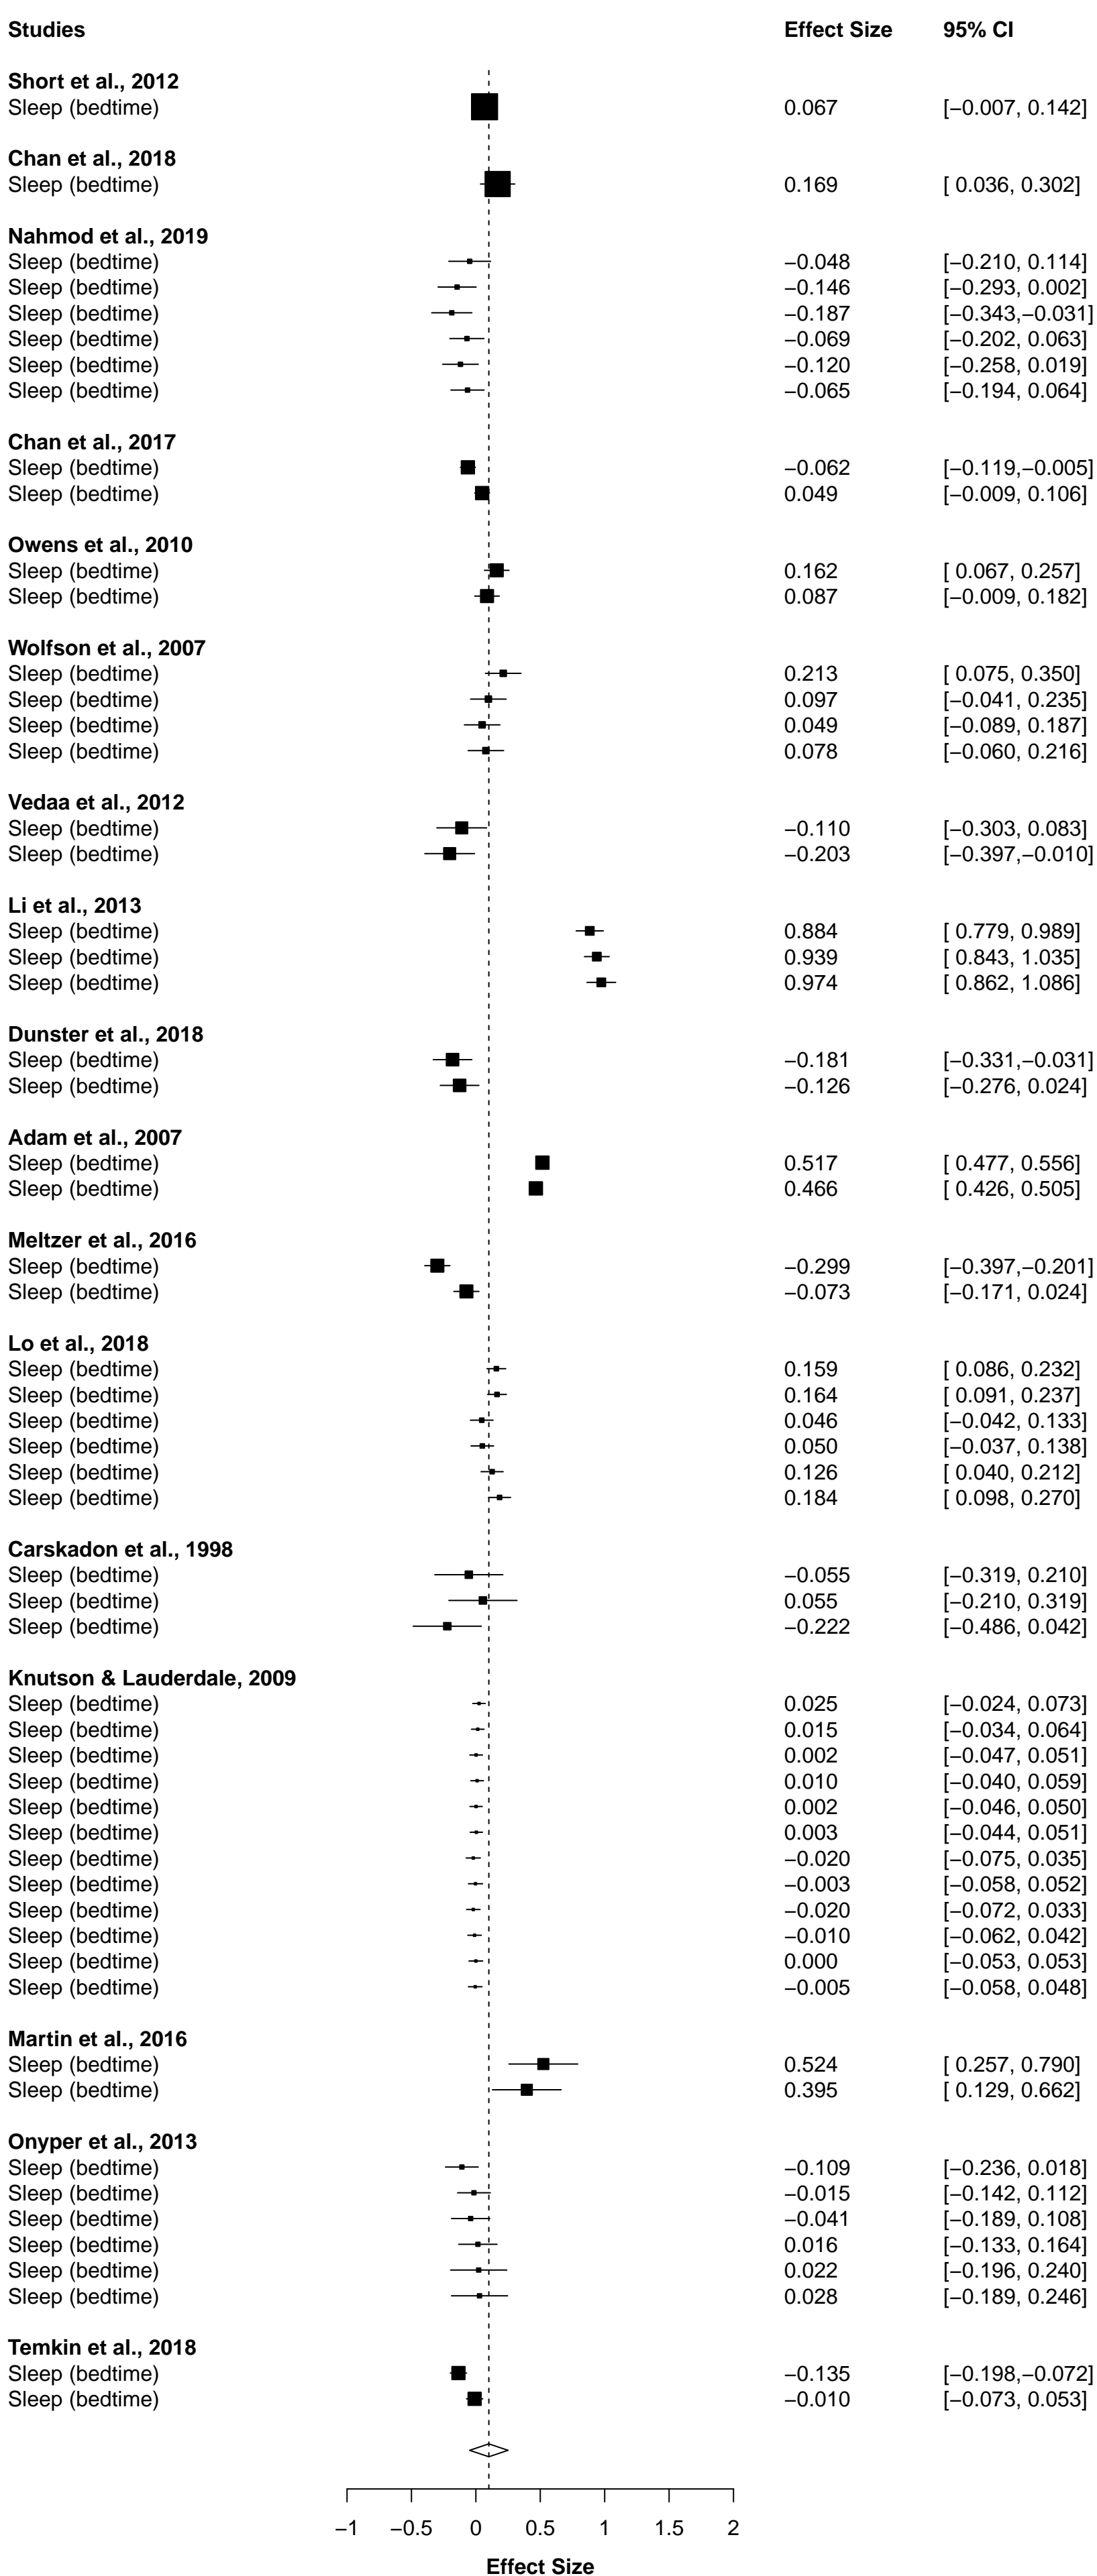

-1 -0.5 0 0.5 1 1.5 2  
Effect Size

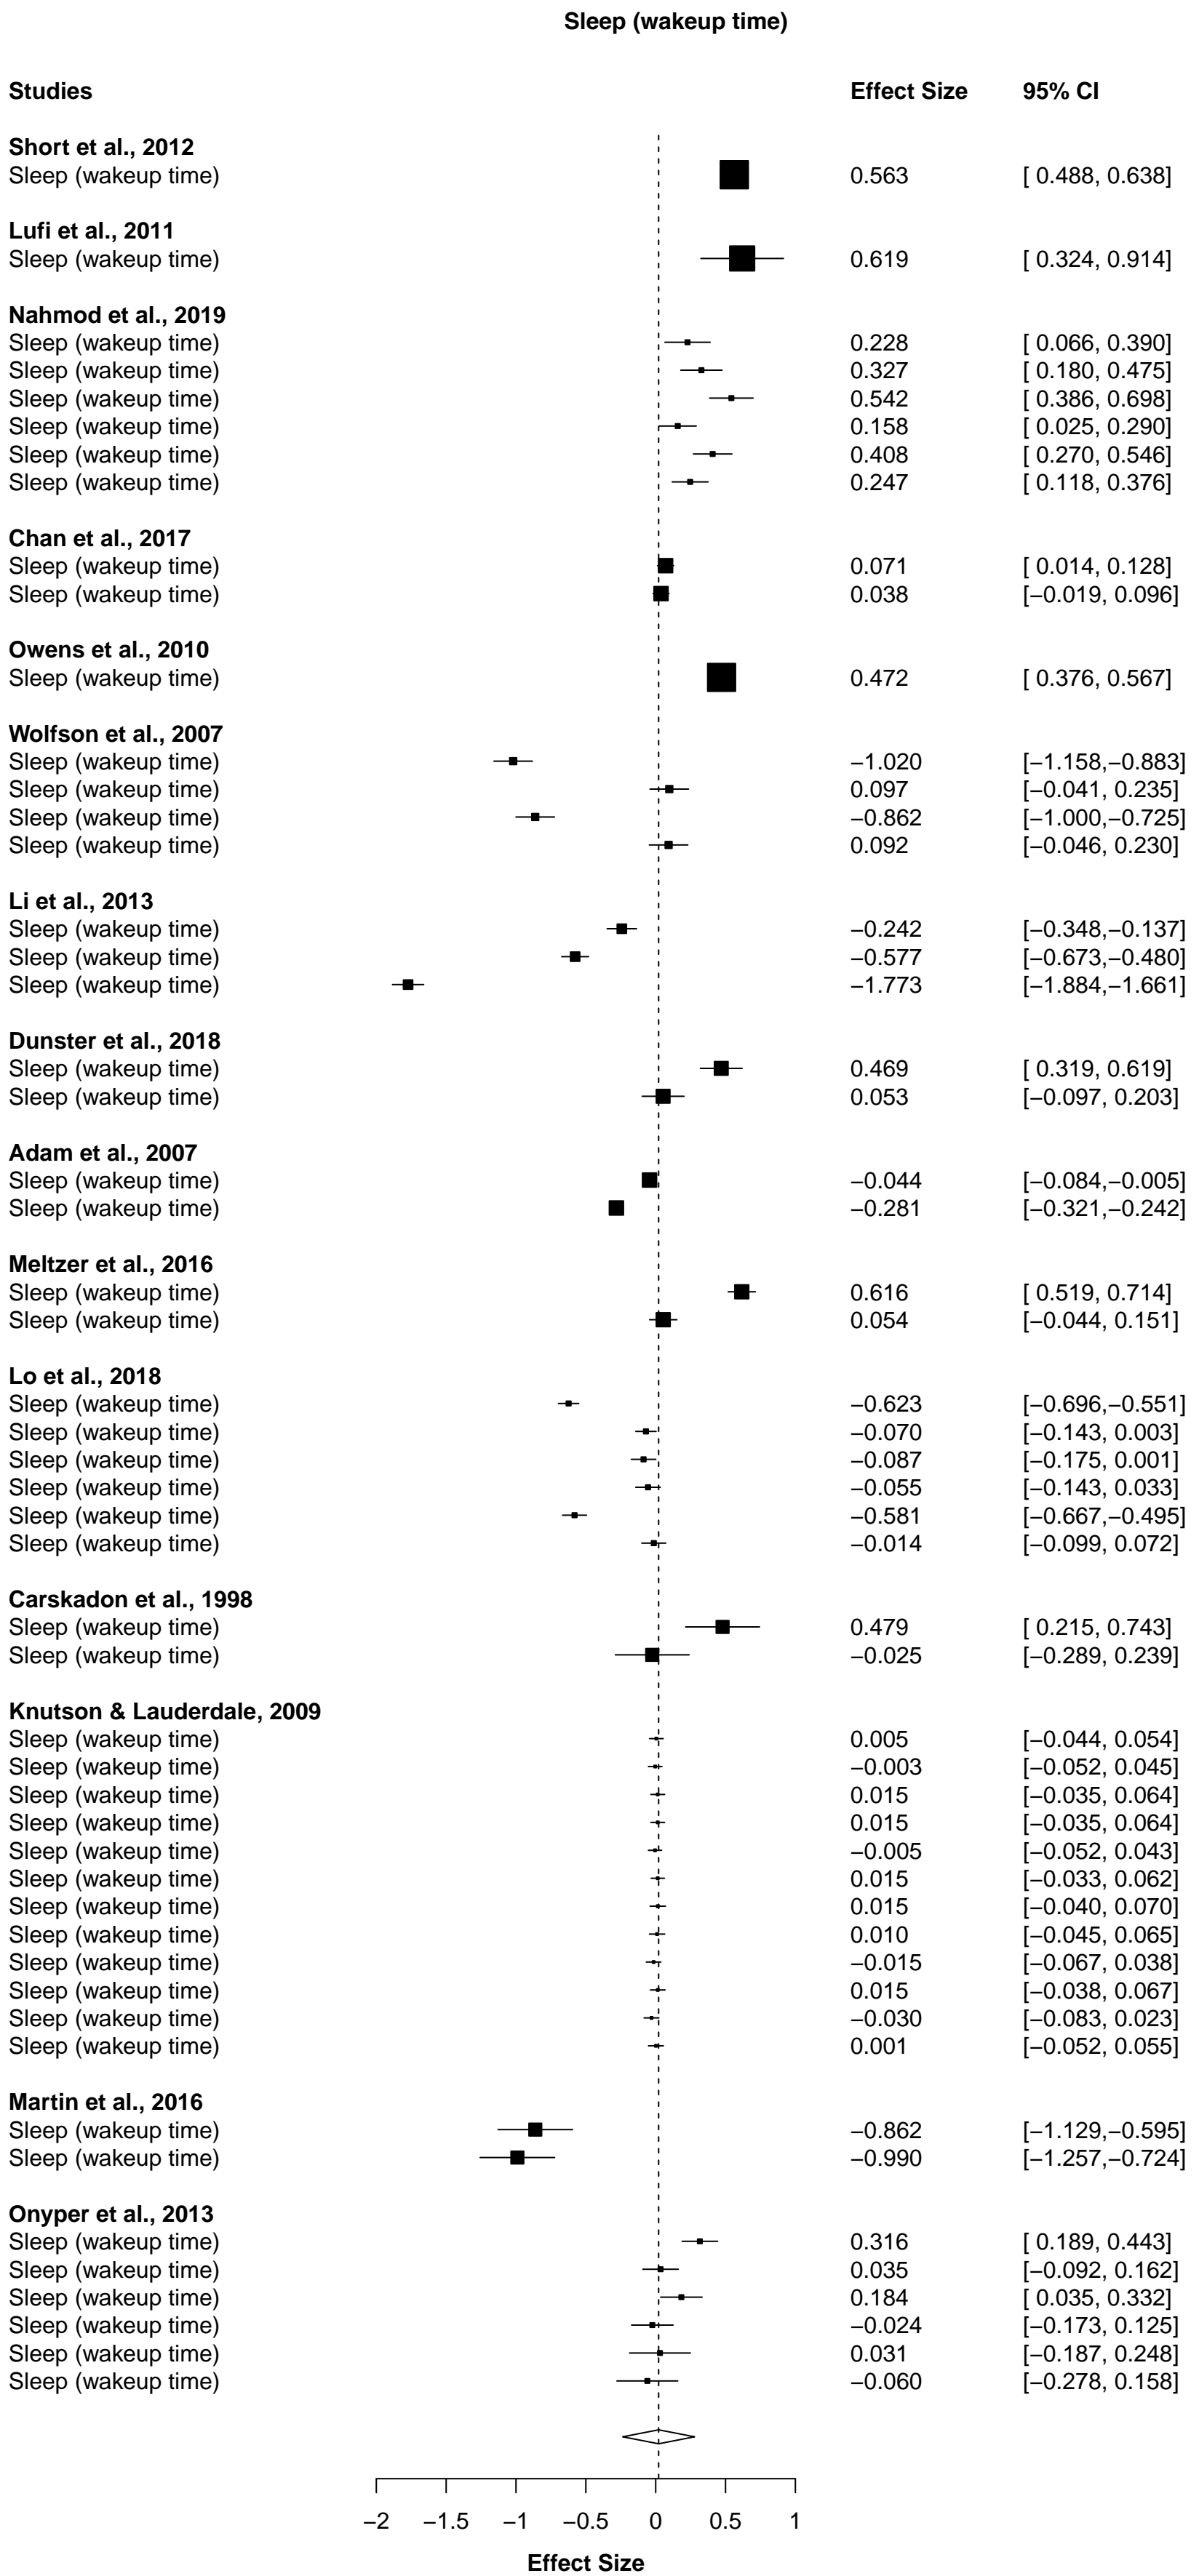

Sleep (sleepiness)

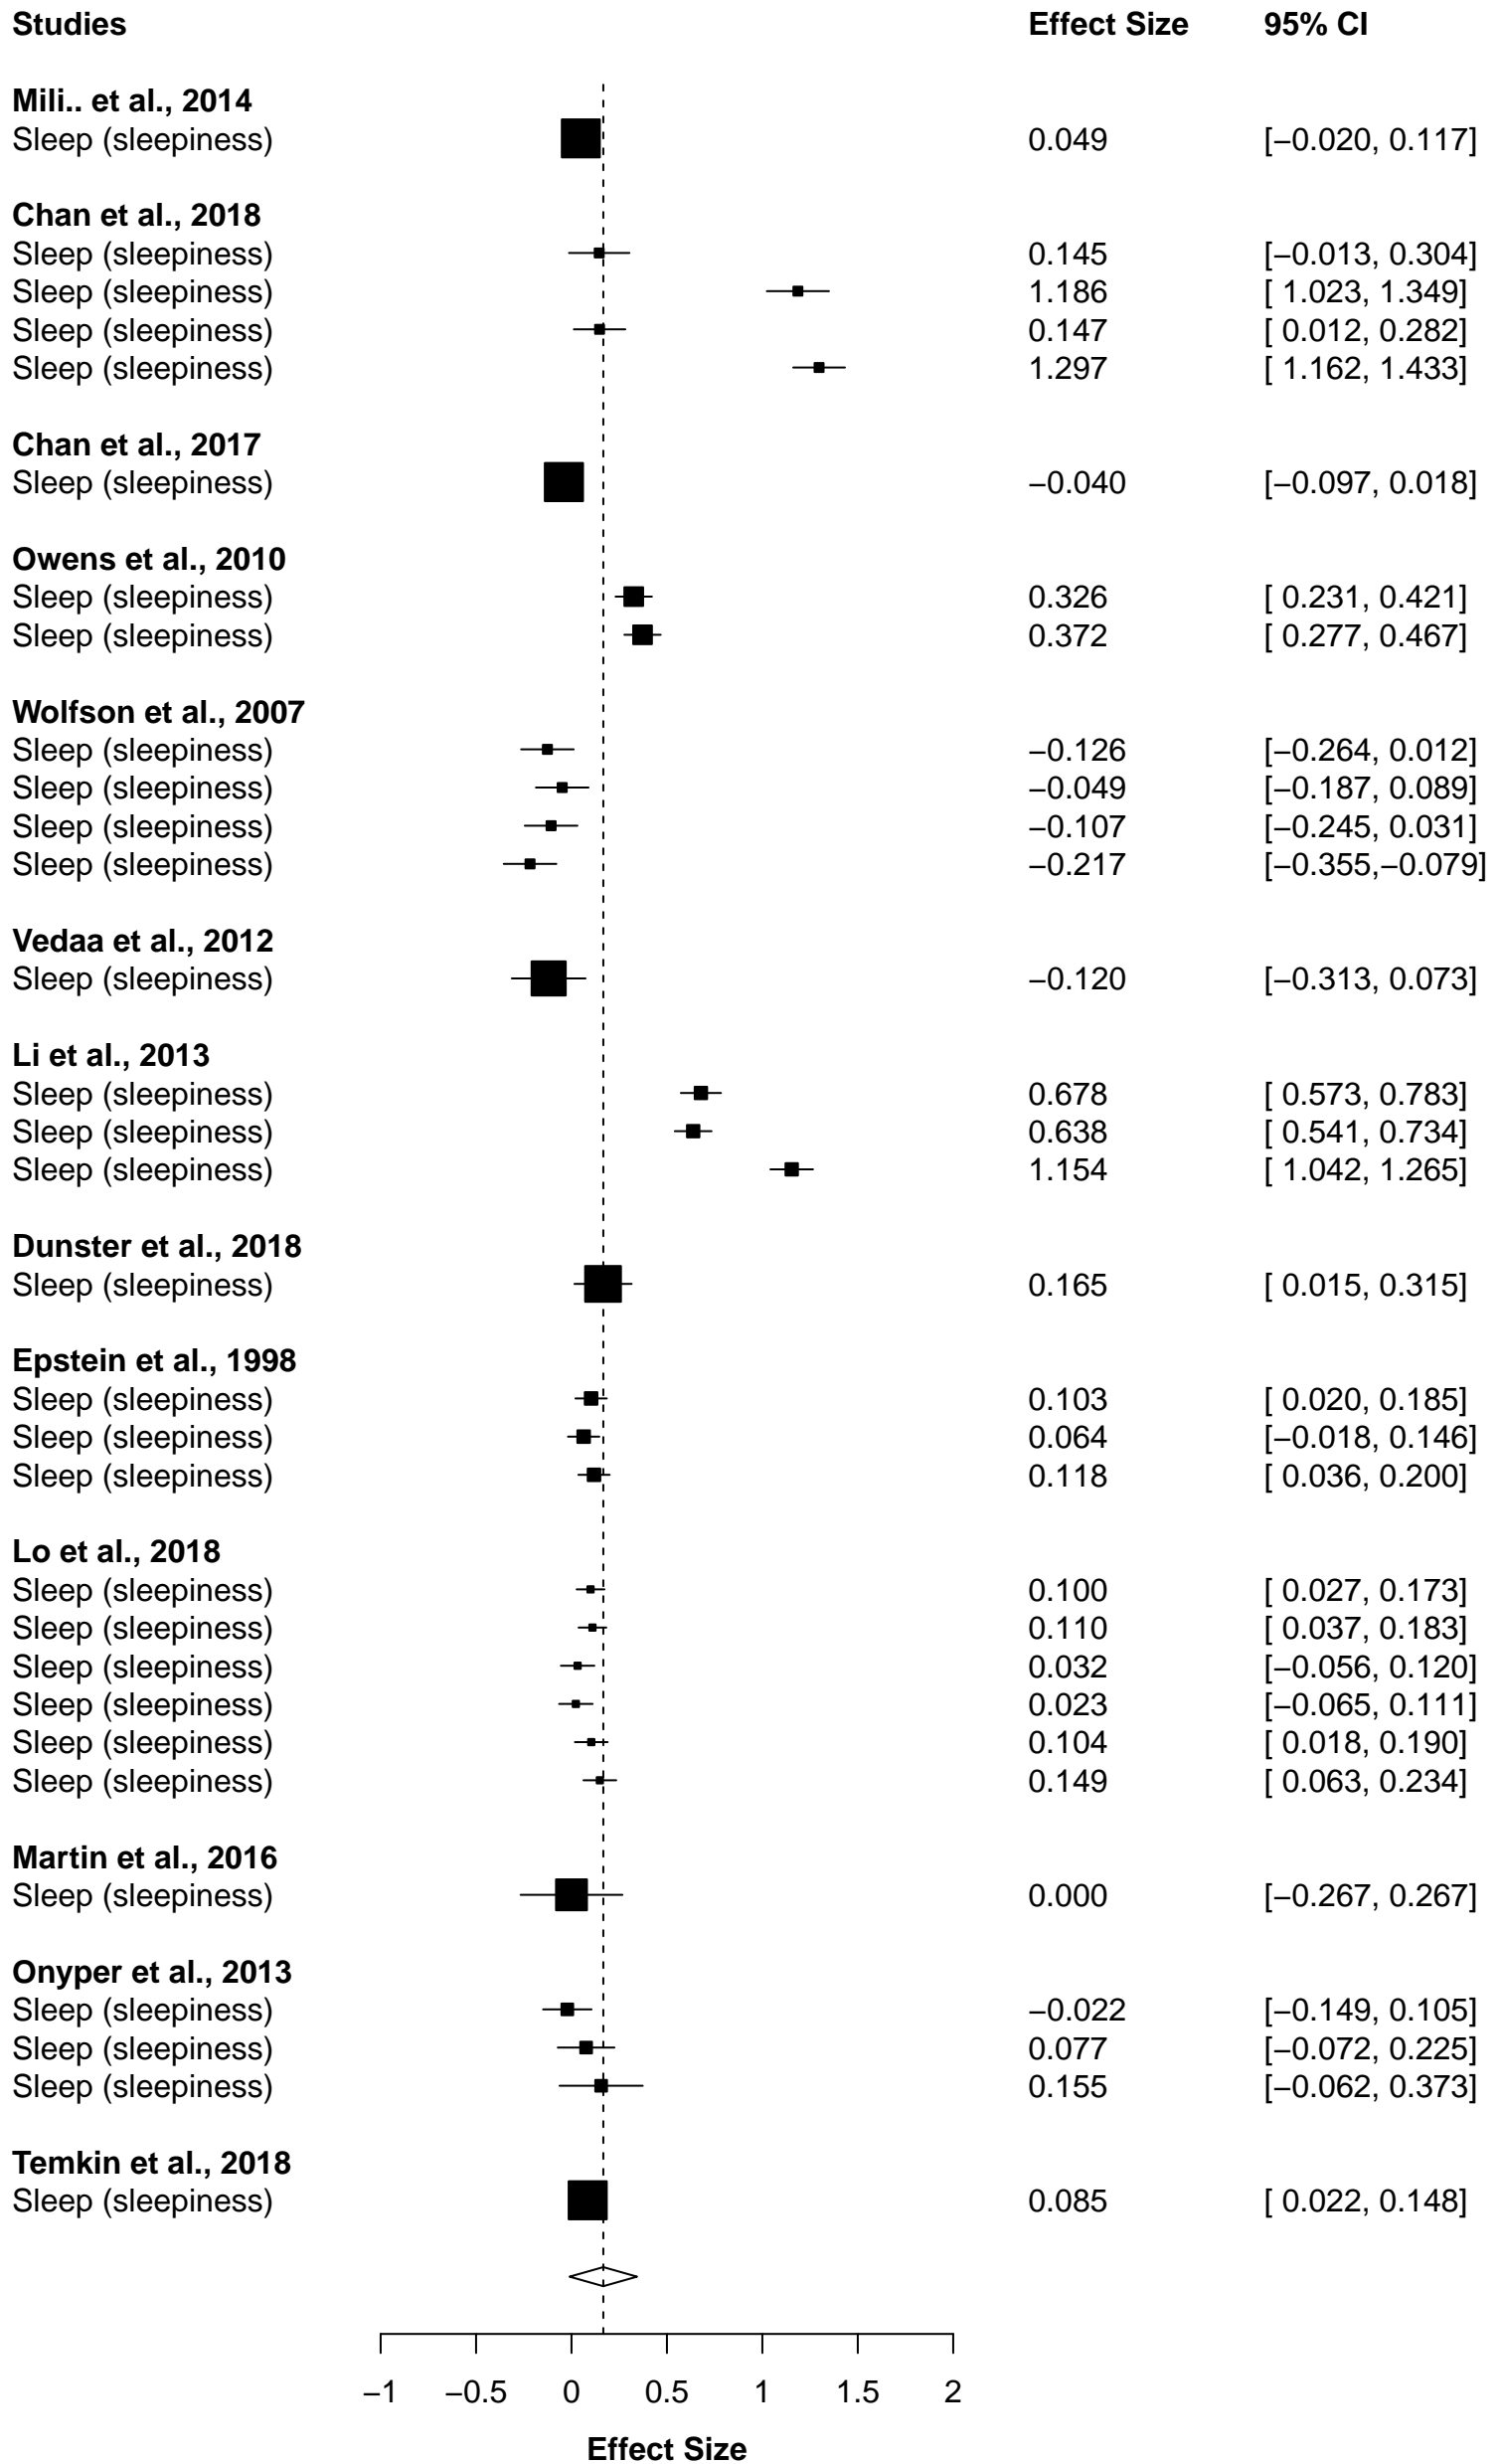

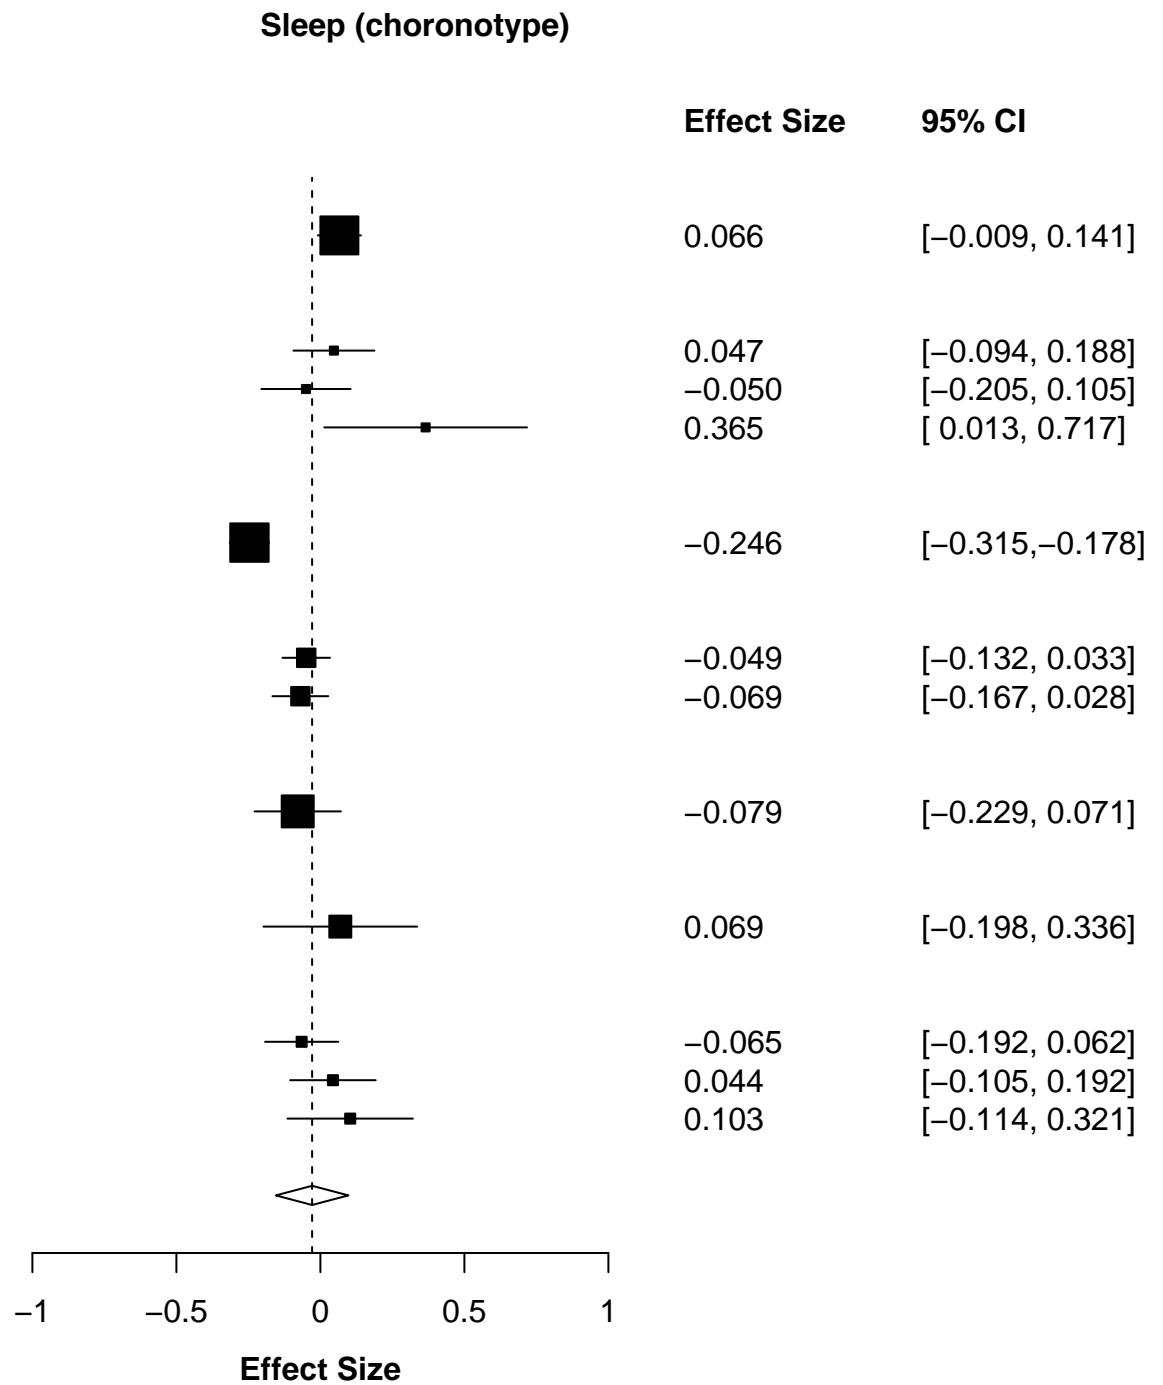

Socioemotional

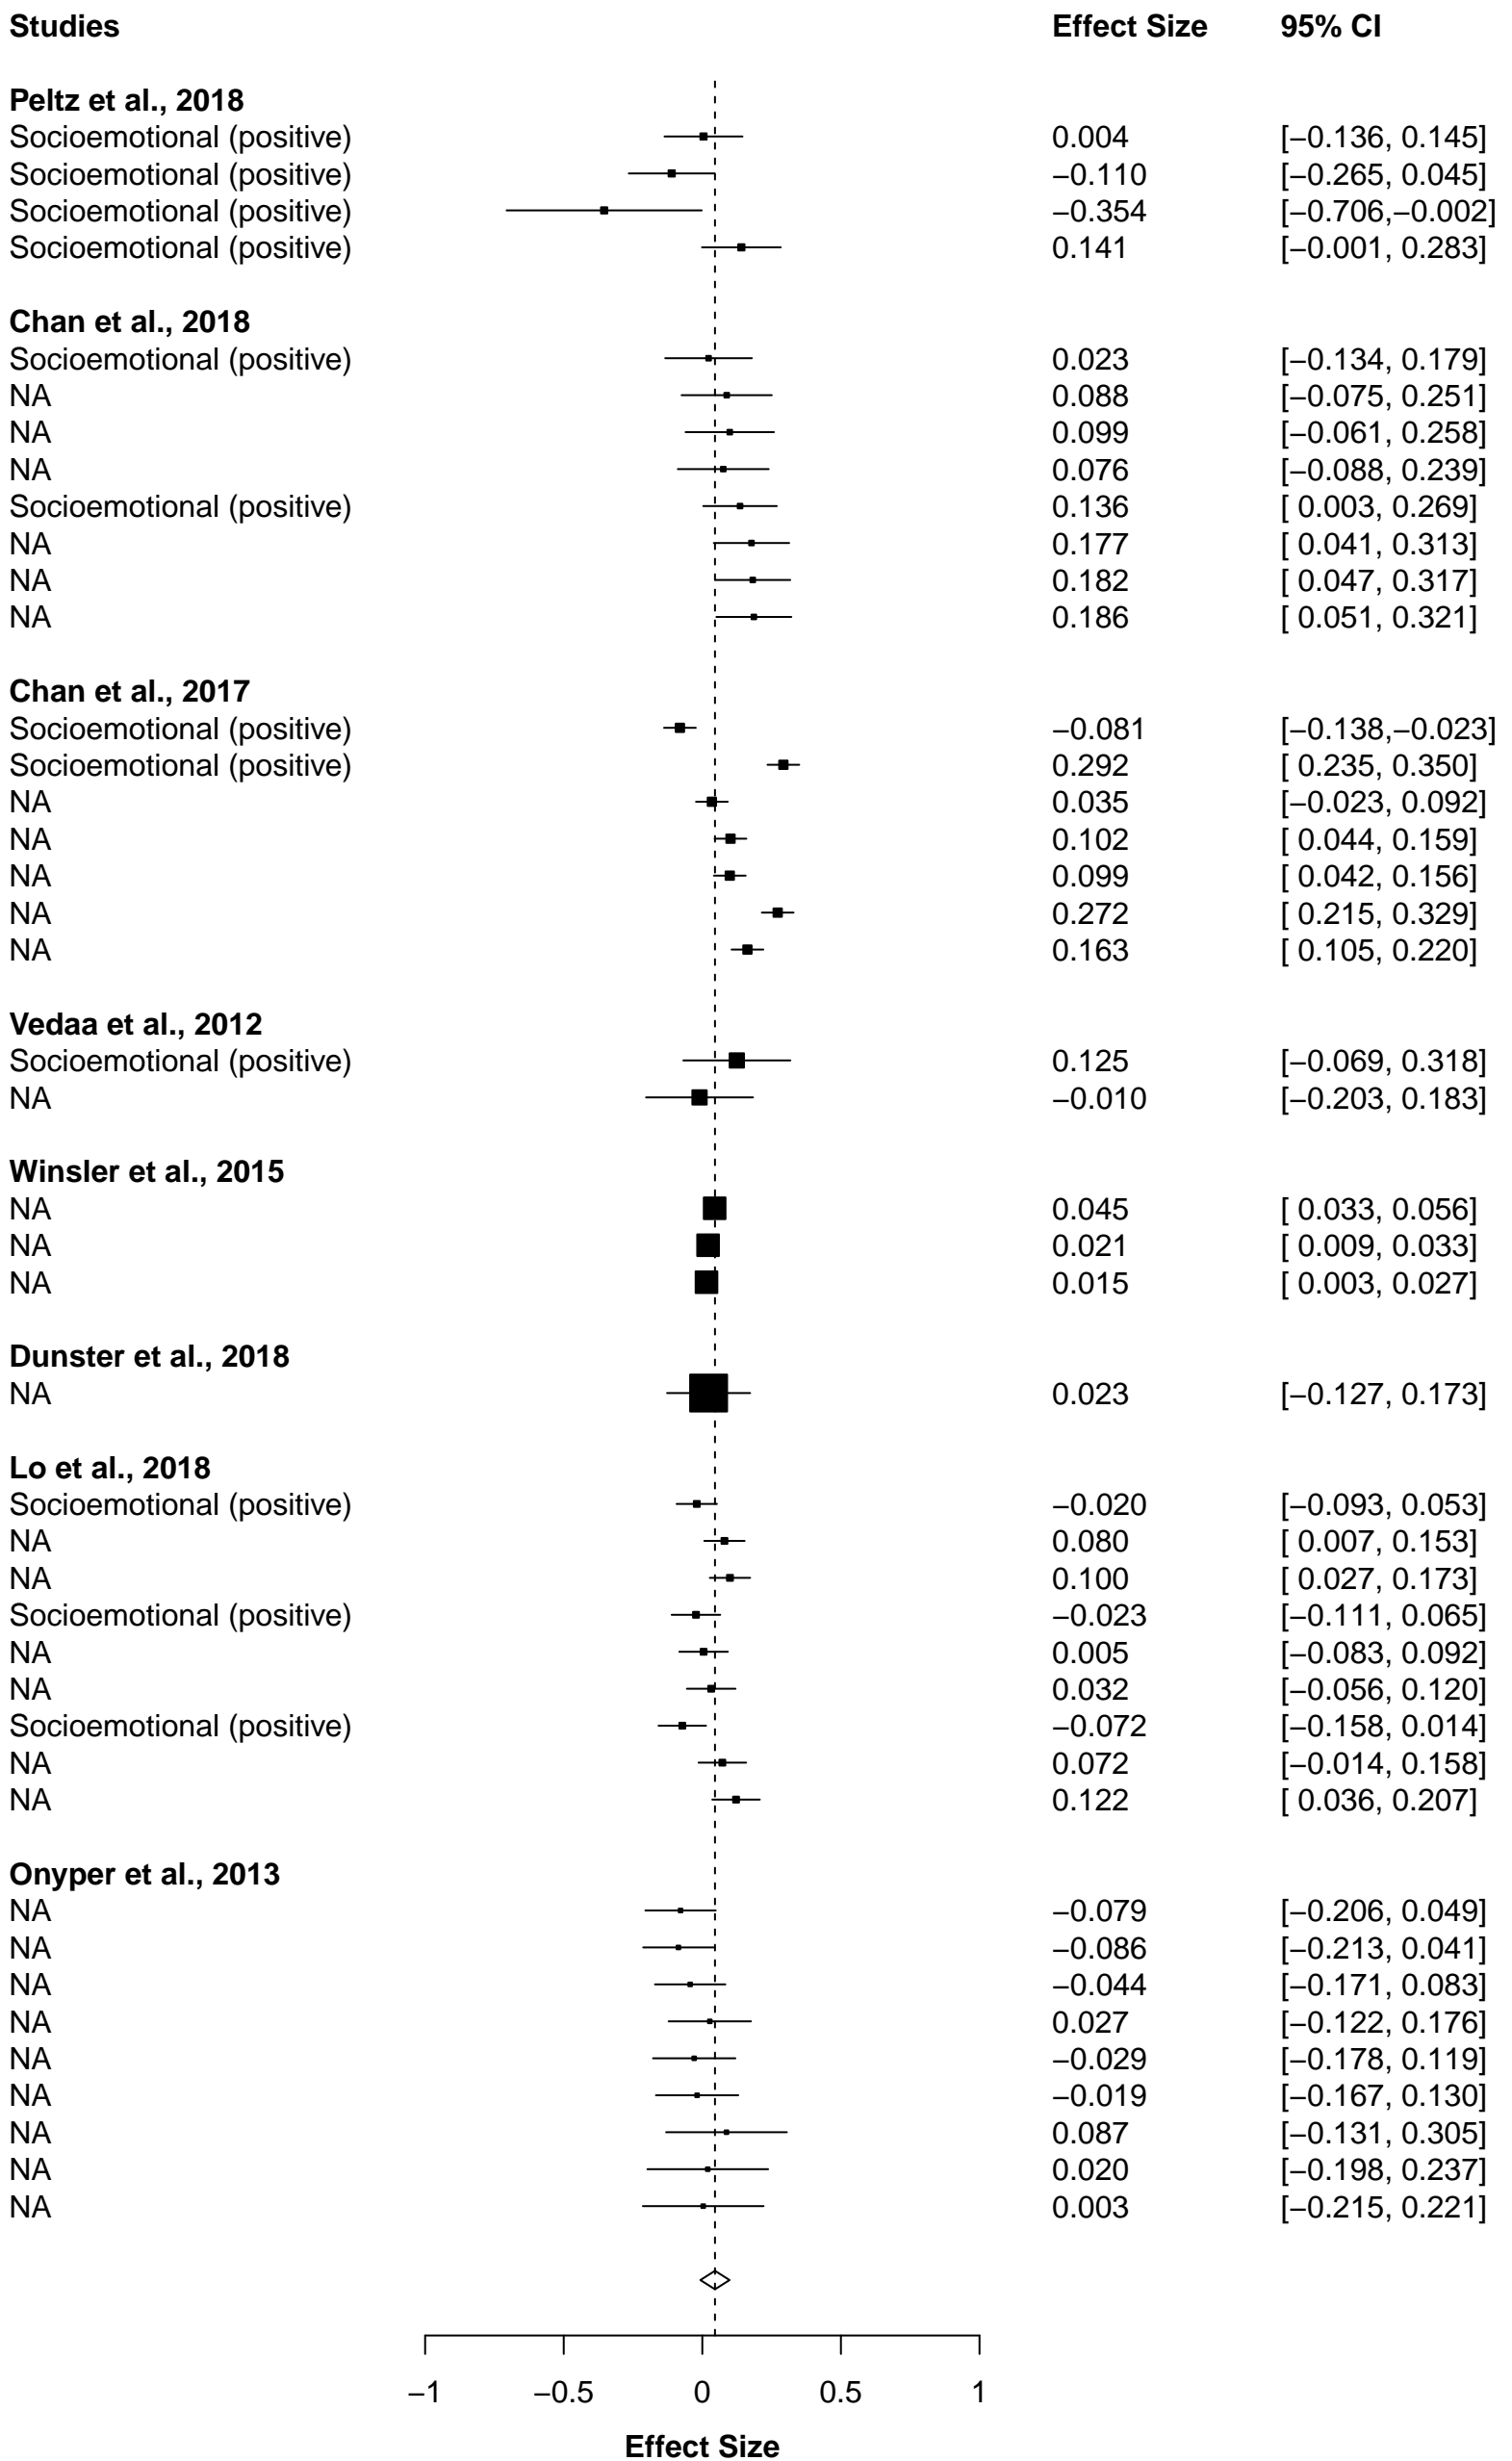



Socioemotional (negative)

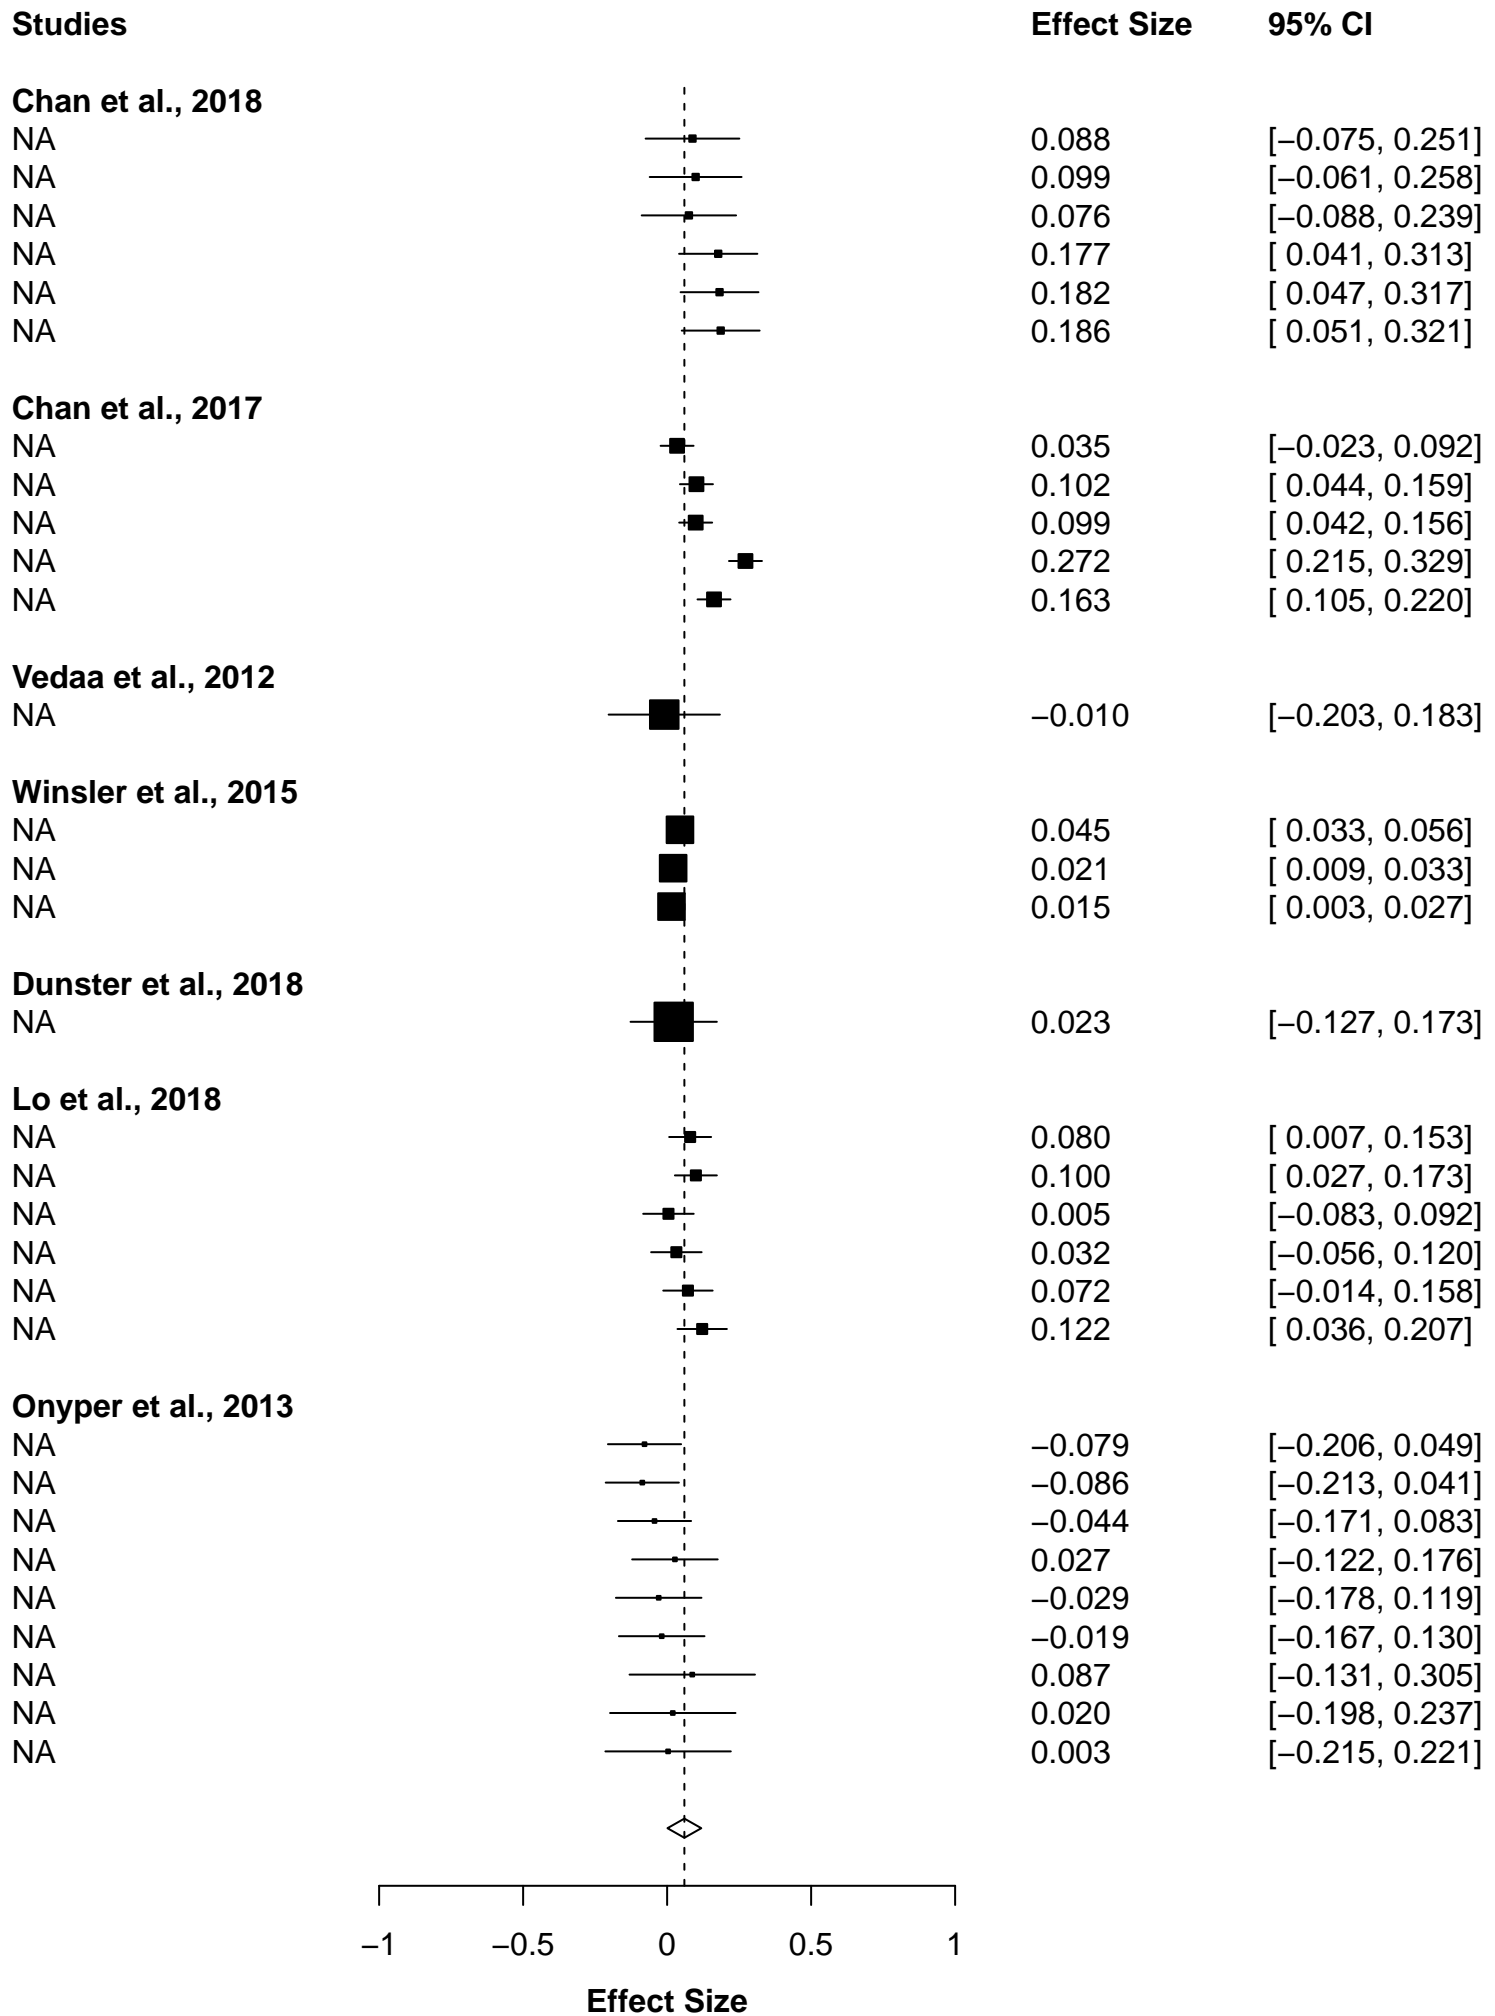

Supplemental Figure 13

Academic

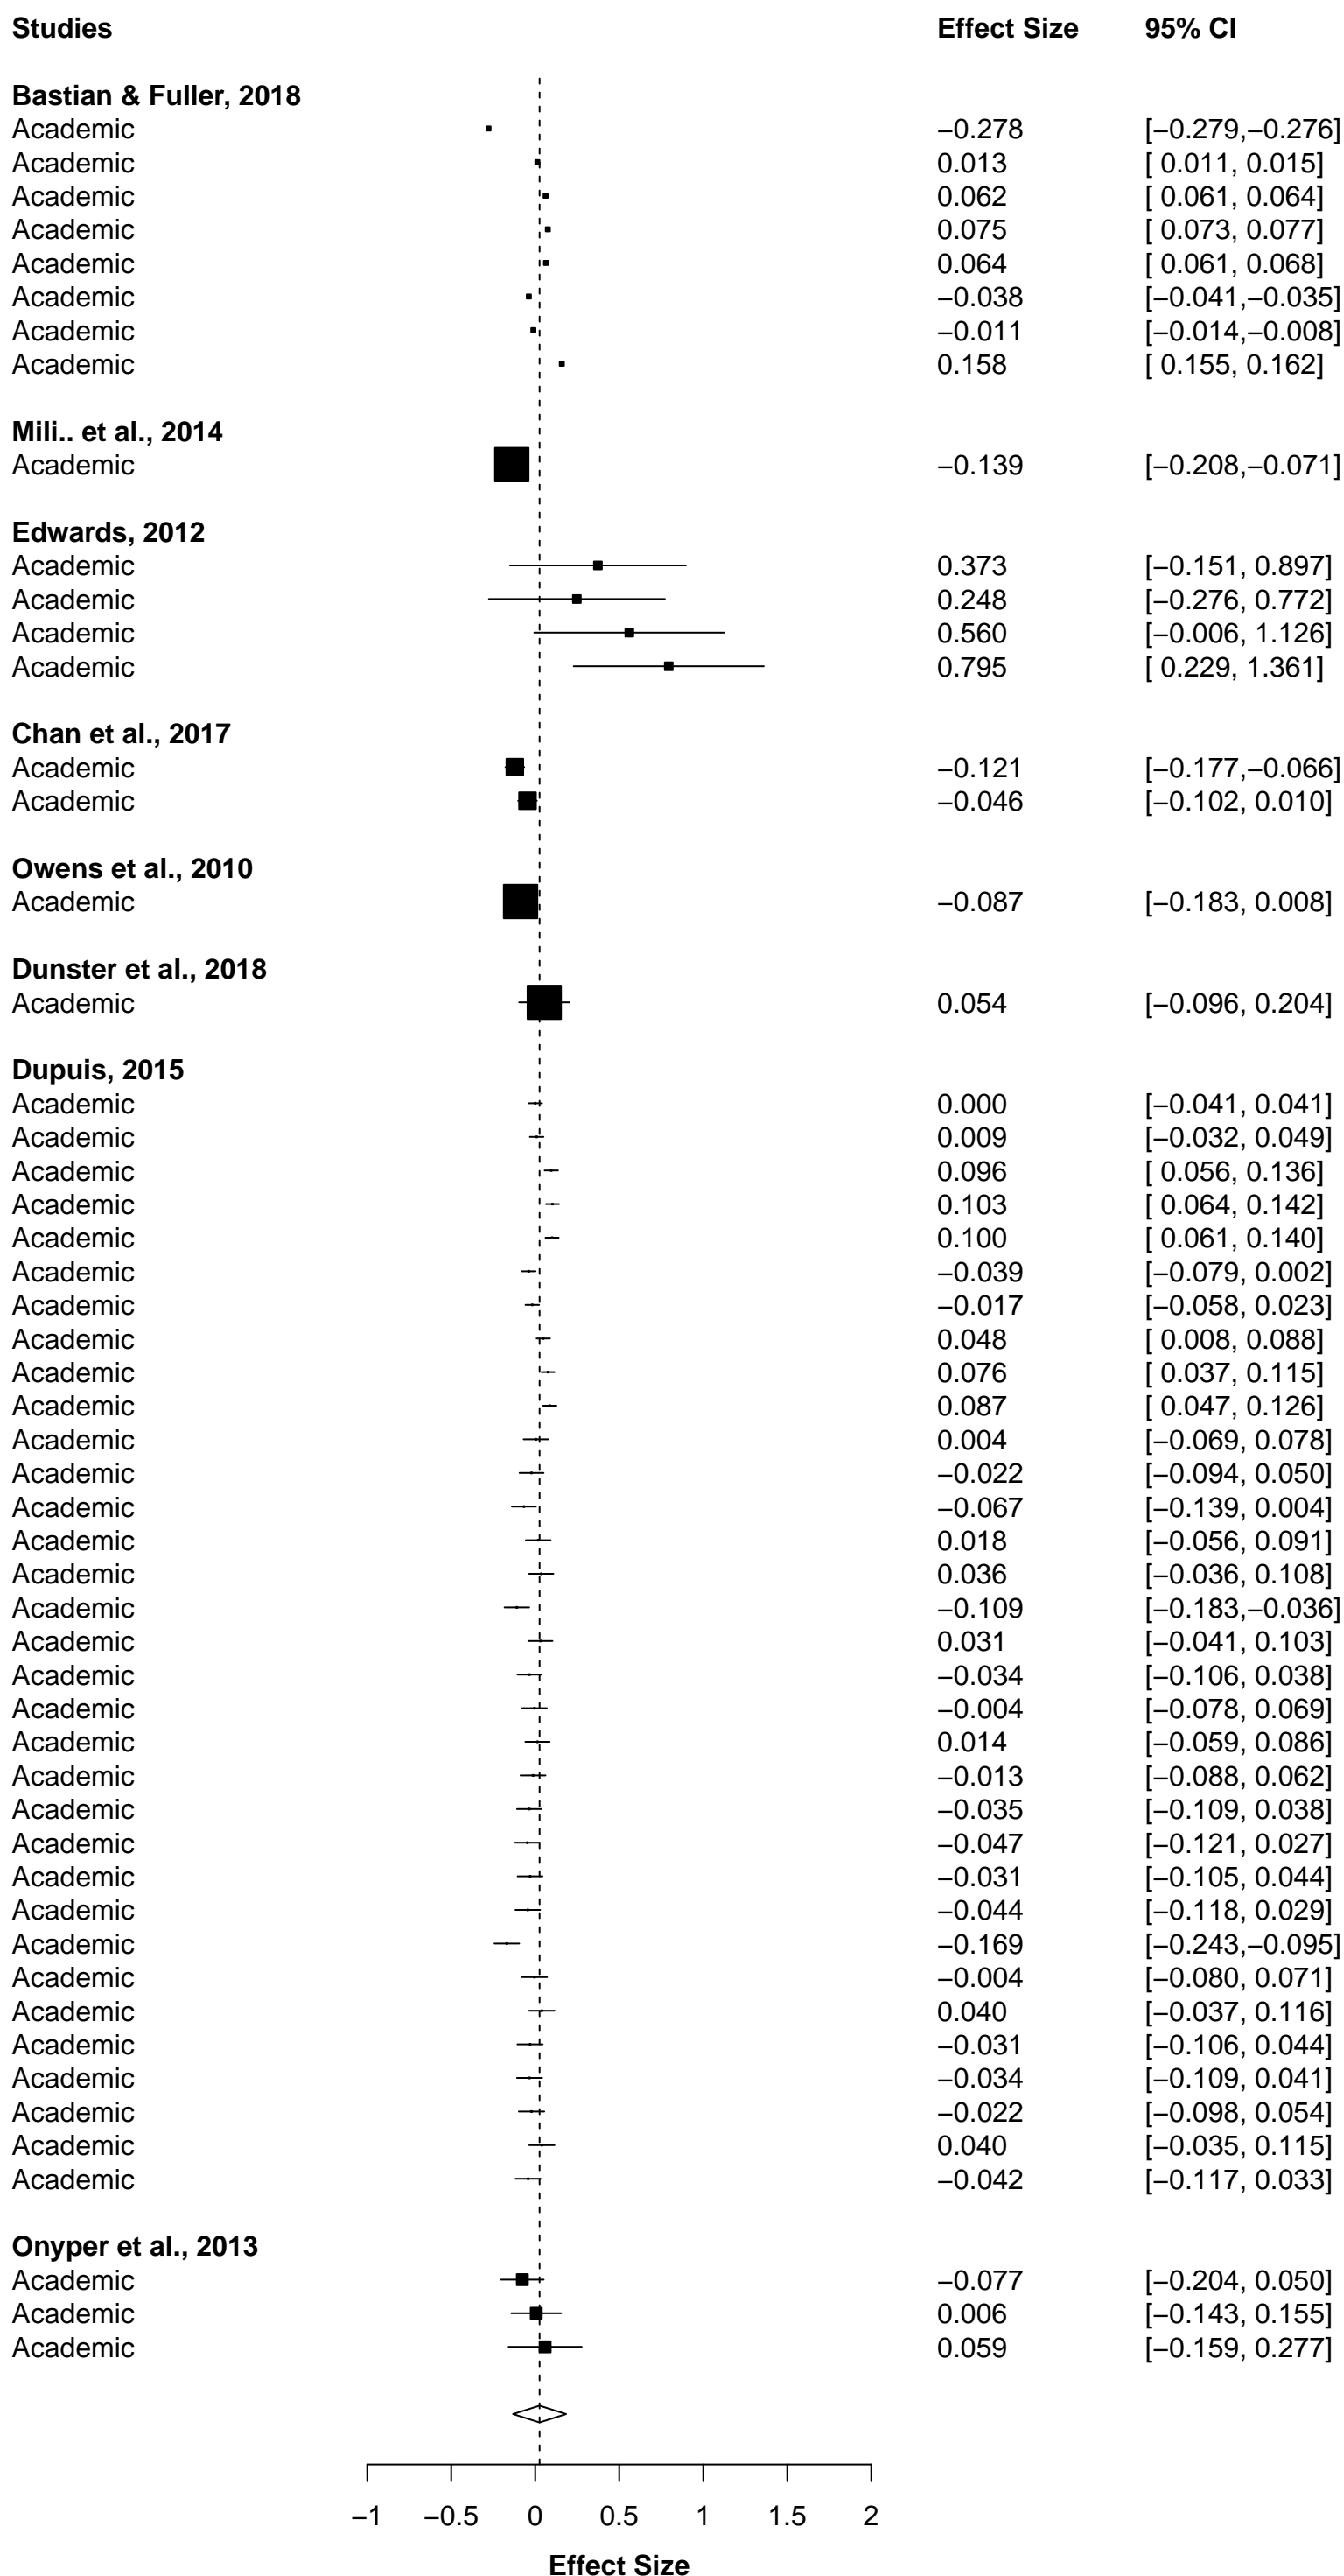

Supplement: NIHMS1840963-supplement-Supplemental_figures_4-13.pdf [file NIHMS1840963-supplement-Supplemental_figures_4-13.pdf]
